# Supplementary material for: Yishen Huazhuo decoction regulates microglial polarization to reduce Alzheimer's disease-related neuroinflammation through TREM2
Source: PubMed Central journal article supplement — Heliyon. 2024 Aug 6;10(16):e35800. doi: 10.1016/j.heliyon.2024.e35800 (PMC11363852; doi:10.1016/j.heliyon.2024.e35800), 2024-08-06

## BV2 细胞 STR 鉴定报告

### 一、 材料处理和检验方法

取适量 **BV2** 细胞( $1 \times 10^6$ )使用 Chelex100 提取 DNA,采用小鼠基因分型试剂盒(Mouse STR v2.0)对 18-3、9-2、6-7、5-5、X-1、15-3、12-1、6-4、CSF1PO、vWA、4-2 和 Jarid1 等 12 个位点进行复合扩增,在 ABI 3130XL 型遗传分析仪上对扩增产物进行检测。

### 二、 检测结果

实验中阴性及阳性对照结果均正确。

**BV2** 细胞株(样品编号为 PNS-MC-22)的 STR 位点的基因分型结果见附表,分型图谱见附图。

### 三、 分析说明

**BV2** 细胞株基因组 DNA 扩增后图谱清晰,分型结果良好。

### 四、 检验结论

1. **BV2** 细胞株 DNA 进行小鼠细胞 STR 分型结果显示,分型结果良好,人源 STR 位点未见特异性扩增峰。
2. **BV2** 细胞株为单一来源小鼠细胞,且没有人源细胞污染。

注:本检测体系的小鼠 STR 检测位点参考 ATCC 专利:mouse cell line authentication (专利号:US9556482B2)

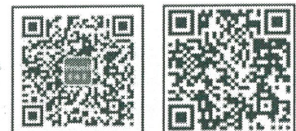

附表 1: 细胞株 BV2 的 STR 位点的基因分型结果

| STR Loci | 样品名称: BV2 (编号 PNS-MC-22) |
|----------|--------------------------|
| 18-3     | 16, 17                   |
| 9-2      | 17. 3                    |
| 6-7      | 15                       |
| 5-5      | 17                       |
| X-1      | 27                       |
| 15-3     | 22. 3, 23. 3, 24. 3      |
| 12-1     | 17                       |
| 6-4      | 18                       |
| CSF1P0   |                          |
| vWA      |                          |
| 4-2      | 20. 3                    |
| Jarid1   | X                        |

武汉普诺赛生命科技有限公司  
Procell Life Science&Technology Co.,Ltd.

附图 1: BV2 细胞 STR 位点的基因分型结果

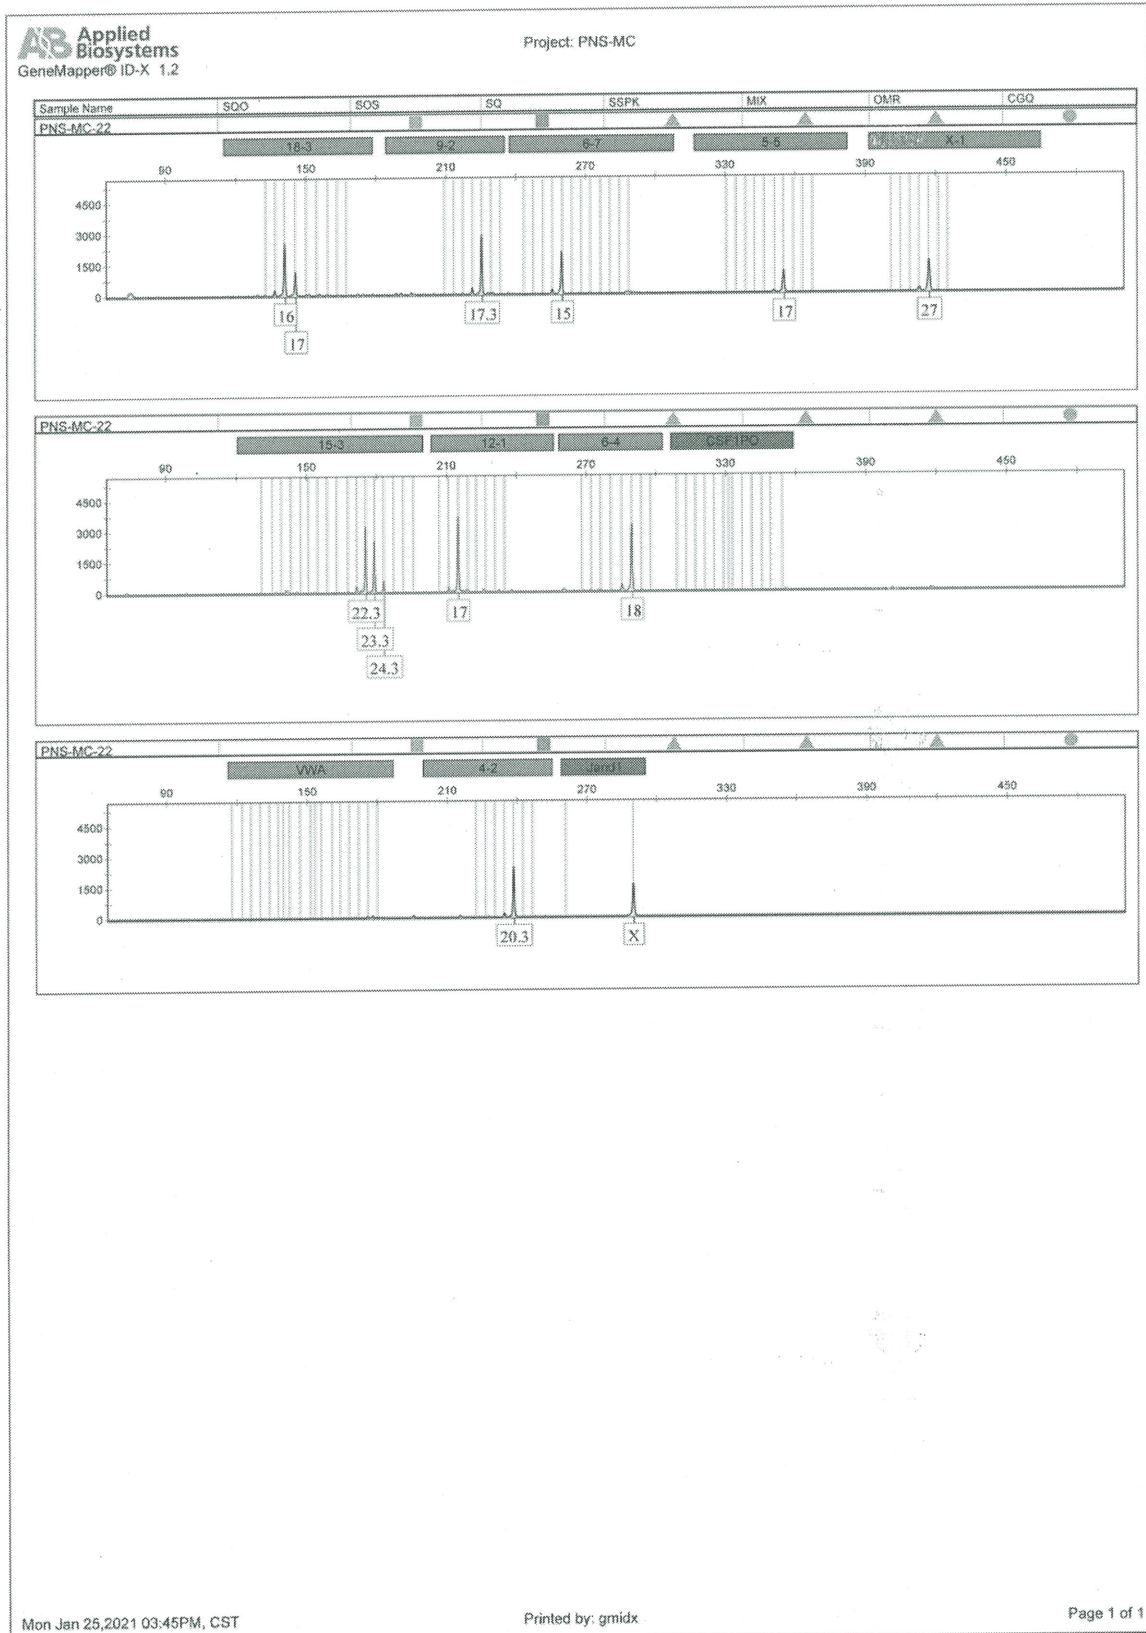

销售电话: 400-650-3656  
企业 QQ: 4006503656  
销售邮箱: [sales@procell.com.cn](mailto:sales@procell.com.cn)  
官方网站: [www.procell.com.cn](http://www.procell.com.cn)

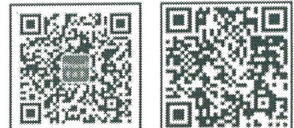

Supplement: mmc1.pdf [file mmc1.pdf]
